# Supplementary material for: Computed Tomography Cardiac Angiography Before Invasive Coronary Angiography in Patients With Previous Bypass Surgery: The BYPASS-CTCA Trial
Source: PubMed Central journal article supplement — Circulation. 2023 Sep 29;148(18):1371–80. doi: 10.1161/CIRCULATIONAHA.123.064465 (PMC11139242; doi:10.1161/circulationaha.123.064465), 2023-09-29
Supplement: cir-148-1371-s001.pdf [file cir-148-1371-s001.pdf]

## Supplementary Material: BYPASS-CTCA

### Contents

- 1. BYPASS-CTCA Investigators, Committees and Collaborators**
- 2. Table S1. Grafts evaluated during ICA.**
- 3. Table S2. Subgroup analysis for the primary endpoint of ICA procedural duration.**
- 4. Table S3. Patient Satisfaction Scores with the ICA Procedure**
- 5. Table S4. Subgroup analysis for the primary endpoint of patient satisfaction with the ICA**
- 6. Table S5: Patient Satisfaction Scores with the CTCA Procedure**
- 7. Table S6: Subgroup analysis for the primary endpoint of CIN**
- 8. Table S7: Percutaneous Coronary Intervention Data**

### **1. BYPASS-CTCA Investigators, Committees and Collaborators**

Investigators:

Dr Daniel Jones, Dr Anne-Marie Beirne, Dr Matthew Kelham, Dr Krishnaraj S. Rathod, Mervyn Andiapen, Lucinda Wynne, Dr Thomas Godec, Nasim Forooghi, Dr Rohini Ramaseshan, Prof James Moon, Dr Ceri Davies, Dr Christos Bourantas PhD, Prof Andreas Baumbach, Prof Charlotte Manisty, Dr Andrew Wragg, Prof Amrita Ahluwalia, Dr Francesca Pugliese, Prof Anthony Mathur

Trial Steering Committee: Prof Adam Timmis, Dr Paul Rees, Prof Riyaz Patel

Data Safety and Monitoring Board: Dr Ajay Gupta, Dr Thomas Treibel, Dr Oliver Guttman, Dr Fizzah Choudry, Professor Rhian Gabe

Research Team:

Amy Richards, Bunny Saberwal, Zara Kavanagh, Nicola Champion, Russell Hall

CVCTU:

Marian Benford, Shahana Chowdhury, Victoria Hammond, Simon Menezes

CT team:

Emma Cheasty, Anu Balan, Leon Menezes, Emily Castle, Joanna Yap- Sanderson, Apurva Sinha, Joanne Vickers, Carmel McCarthy.

Cath Lab Team:

Steve Hamshere, Katrina Comer, Katherine Egan, Mohanakumar Sooriyamohan, Maria Tsiatsani, Rob Hall.

2. Table S1. Grafts evaluated during ICA. Data are reported as number (%)

|                                                 |                            | CTCA + ICA<br>N=321 | ICA<br>N=342 | P-value |
|-------------------------------------------------|----------------------------|---------------------|--------------|---------|
| <b>Number of grafts evaluated at ICA, n (%)</b> | 0                          | 38 (11.8%)          | 11 (3.2%)    | <0.001  |
|                                                 | 1                          | 99 (30.8%)          | 66 (19.3%)   |         |
|                                                 | 2                          | 94 (29.3%)          | 104 (30.4%)  |         |
|                                                 | 3                          | 63 (19.6%)          | 129 (37.7%)  |         |
|                                                 | 4                          | 24 (7.5%)           | 31 (9.1%)    |         |
|                                                 | 5                          | 3 (0.9%)            | 1 (0.3%)     |         |
| <b>Number of grafts not evaluated, n (%)</b>    | 0                          | 129 (40.2%)         | 208 (60.8%)  | <0.001  |
|                                                 | 1                          | 91 (28.4%)          | 87 (25.4%)   |         |
|                                                 | 2                          | 71 (22.1%)          | 41 (12.0%)   |         |
|                                                 | 3                          | 23 (7.2%)           | 6 (1.8%)     |         |
|                                                 | 4                          | 6 (1.9%)            | 0 (0%)       |         |
|                                                 | 5                          | 1 (0.3%)            | 0 (0%)       |         |
| <b>Reasons for not evaluating, n (%)</b>        | CT showed already occluded | 150 (46.7%)         | 0            | <0.001  |
|                                                 | CT showed graft as patent  | 77 (24.0%)          | 0            |         |
|                                                 | Known Occluded             | 0 (0%)              | 58 (17.0%)   |         |
|                                                 | Assumed occluded           | 0 (0%)              | 13 (3.8%)    |         |
|                                                 | Unable to locate           | 1 (0.3%)            | 73 (21.4%)   |         |

3. **Table S2. Subgroup analysis for the primary endpoint of ICA procedural duration.**  
 Data reported as mean (SD) minutes and mean difference with 98.33% CI. \*Adjusted for baseline creatinine & ACS

|                                                 | Treatment group     |              | Covariate adjusted*    |         |                        |
|-------------------------------------------------|---------------------|--------------|------------------------|---------|------------------------|
|                                                 | ICA + CTCA<br>N=321 | ICA<br>N=342 | Difference (98.33% CI) | P-value | Interaction<br>p-value |
| <b>Non-Caucasian (N=284)</b>                    | 18.2 (10.4)         | 39.1 (16.3)  | -21.0 (-25.0 to -17.0) | <0.001  | 0.38                   |
| <b>Caucasian (N=401)</b>                        | 16.9 (10.2)         | 39.8 (17.4)  | -22.9 (-26.3 to -19.5) | <0.001  |                        |
| <b>No ACS (N=375)</b>                           | 18.6 (10.3)         | 39.1 (17.1)  | -20.5 (-23.9 to -17.0) | <0.001  | 0.09                   |
| <b>ACS (N=310)</b>                              | 15.9 (10.0)         | 40.0 (16.7)  | -24.1 (-27.9 to -20.3) | <0.001  |                        |
| <b>No previous angiogram since CABG (N=368)</b> | 17.8 (10.1)         | 41.3 (16.2)  | -23.5 (-27.0 to -20.0) | <0.001  | 0.21                   |
| <b>Previous angiogram since CABG (N=317)</b>    | 17.0 (10.4)         | 37.8 (17.4)  | -20.8 (-24.6 to -17.1) | <0.001  |                        |
| <b>Junior operator (N=495)</b>                  | 18.6 (9.2)          | 37.1 (15.0)  | -18.6 (-21.5 to -15.6) | <0.001  | 0.01                   |
| <b>Senior operator (N=168)</b>                  | 18.6 (10.9)         | 44.1 (19.2)  | -25.6 (-31.0 to -20.1) | <0.001  |                        |

4. **Table S3. Patient Satisfaction Scores with the ICA Procedure.** Data are reported as number (%) aside from the mean scores which are mean (SD). For the mean score, very good = 1 and very poor = 5.

|                                                                           |                        | <b>CTCA + ICA<br/>N=321</b> | <b>ICA<br/>N=341</b> | <b>P-value</b>   |
|---------------------------------------------------------------------------|------------------------|-----------------------------|----------------------|------------------|
| <b>Please rate the preparation and information prior to this test</b>     | Very good, n (%)       | 234 (72.9%)                 | 191 (56.0%)          | <0.001           |
|                                                                           | Good, n (%)            | 86 (26.8%)                  | 138 (40.5%)          |                  |
|                                                                           | Moderate, n (%)        | 0 (0%)                      | 10 (2.9%)            |                  |
|                                                                           | Poor, n (%)            | 0 (0%)                      | 2 (0.6%)             |                  |
|                                                                           | Very poor, n (%)       | 1 (0.3%)                    | 0 (0%)               |                  |
|                                                                           | <b>Mean score (SD)</b> | <b>1.3 (0.5)</b>            | <b>1.5 (0.6)</b>     |                  |
| <b>Please rate your degree of concern prior to this test</b>              | No concern, n (%)      | 142 (44.2%)                 | 150 (44.0%)          | 0.58             |
|                                                                           | Little, n (%)          | 105 (32.7%)                 | 96 (28.2%)           |                  |
|                                                                           | Moderate, n (%)        | 53 (16.5%)                  | 71 (20.8%)           |                  |
|                                                                           | Intense, n (%)         | 17 (5.3%)                   | 20 (5.9%)            |                  |
|                                                                           | Very intense, n (%)    | 4 (1.3%)                    | 4 (1.2%)             |                  |
|                                                                           | <b>Mean score (SD)</b> | <b>1.9 (1.0)</b>            | <b>1.9 (1.0)</b>     |                  |
| <b>Please rate the comfort of this test</b>                               | Very good, n (%)       | 101 (31.5%)                 | 32 (9.4%)            | <0.001           |
|                                                                           | Good, n (%)            | 174 (54.2%)                 | 96 (28.2%)           |                  |
|                                                                           | Moderate, n (%)        | 42 (13.1%)                  | 154 (45.3%)          |                  |
|                                                                           | Poor, n (%)            | 3 (0.9%)                    | 51 (15.0%)           |                  |
|                                                                           | Very poor, n (%)       | 1 (0.3%)                    | 7 (2.1%)             |                  |
|                                                                           | <b>Mean score (SD)</b> | <b>1.8 (0.7)</b>            | <b>2.7 (0.9)</b>     |                  |
| <b>Please rate your degree of helplessness during this test</b>           | No helplessness, n (%) | 157 (48.9%)                 | 78 (22.9%)           | <0.001           |
|                                                                           | Little, n (%)          | 131 (40.8%)                 | 70 (20.6%)           |                  |
|                                                                           | Moderate, n (%)        | 26 (8.1%)                   | 137 (40.3%)          |                  |
|                                                                           | Intense, n (%)         | 5 (1.6%)                    | 53 (15.6%)           |                  |
|                                                                           | Very intense, n (%)    | 2 (0.6%)                    | 2 (0.6%)             |                  |
|                                                                           | <b>Mean score (SD)</b> | <b>1.6 (0.8)</b>            | <b>2.5 (1.0)</b>     |                  |
| <b>Please rate your pain during and immediately after this test (0-5)</b> | <b>Mean score (SD)</b> | <b>1.5 (1.2)</b>            | <b>2.8 (1.5)</b>     | <b>&lt;0.001</b> |
| <b>Please rate your overall satisfaction with this test</b>               | Very good, n (%)       | 178 (55.4%)                 | 67 (19.7%)           | <0.001           |
|                                                                           | Good, n (%)            | 130 (40.5%)                 | 91 (26.7%)           |                  |
|                                                                           | Moderate, n (%)        | 13 (4.1%)                   | 124 (36.4%)          |                  |
|                                                                           | Poor, n (%)            | 0 (0%)                      | 51 (15.0%)           |                  |
|                                                                           | Very poor, n (%)       | 0 (0%)                      | 8 (2.4%)             |                  |
|                                                                           | <b>Mean score (SD)</b> | <b>1.5 (0.6)</b>            | <b>2.5 (1.0)</b>     |                  |

5. **Table S4. Subgroup analysis for the primary endpoint of patient satisfaction with the ICA.** Data reported as mean (SD) and mean difference with 98.33% CI. \*Adjusted for baseline creatinine & ACS

|                                                 | Treatment group     |              | Covariate adjusted*    |         |                        |
|-------------------------------------------------|---------------------|--------------|------------------------|---------|------------------------|
|                                                 | ICA + CTCA<br>N=321 | ICA<br>N=341 | Difference (98.33% CI) | P-value | Interaction<br>p-value |
| <b>Non-Caucasian (N=277)</b>                    | 1.5 (0.6)           | 2.5 (1.0)    | -1.0 (-1.2 to -0.7)    | <0.001  | 0.46                   |
| <b>Caucasian (N=385)</b>                        | 1.5 (0.6)           | 2.6 (1.1)    | -1.1 (-1.3 to -0.9)    | <0.001  |                        |
| <b>No ACS (N=365)</b>                           | 1.5 (0.6)           | 2.5 (1.0)    | -1.1 (-1.3 to -0.8)    | <0.001  | 0.90                   |
| <b>ACS (N=297)</b>                              | 1.5 (0.6)           | 2.6 (1.1)    | -1.0 (-1.3 to -0.8)    | <0.001  |                        |
| <b>No previous angiogram since CABG (N=352)</b> | 1.5 (0.6)           | 2.5 (1.1)    | -1.0 (-1.3 to -0.8)    | <0.001  | 0.99                   |
| <b>Previous angiogram since CABG (N=310)</b>    | 1.5 (0.6)           | 2.5 (1.0)    | -1.1 (-1.3 to -0.8)    | <0.001  |                        |
| <b>Junior operator (N=494)</b>                  | 1.5 (0.6)           | 2.4 (1.0)    | -0.9 (-1.1 to -0.8)    | <0.001  | 0.03                   |
| <b>Senior operator (N=168)</b>                  | 1.5 (0.5)           | 2.8 (1.0)    | -1.3 (-1.6 to -0.9)    | <0.001  |                        |

6. **Table S5. Patient Satisfaction Scores with the CTCA Procedure.** Data are reported as number (%) aside from the mean scores which are mean (SD). For the mean score, very good = 1 and very poor = 5.

|                                                                             |                        | <b>CTCA + ICA<br/>(n=329)</b> |
|-----------------------------------------------------------------------------|------------------------|-------------------------------|
| <b>Please rate the preparation and information prior to this test (1-5)</b> | Very good, n (%)       | 270 (82.3%)                   |
|                                                                             | Good, n (%)            | 56 (17.1%)                    |
|                                                                             | Moderate, n (%)        | 1 (0.3%)                      |
|                                                                             | Poor, n (%)            | 0 (0%)                        |
|                                                                             | Very poor, n (%)       | 1 (0.3%)                      |
|                                                                             | <b>Mean score (SD)</b> | <b>1.2 (0.4)</b>              |
| <b>Please rate your degree of concern prior to this test (1-5)</b>          | No concern, n (%)      | 265 (80.6%)                   |
|                                                                             | Little, n (%)          | 38 (11.6%)                    |
|                                                                             | Moderate, n (%)        | 16 (4.9%)                     |
|                                                                             | Intense, n (%)         | 8 (2.4%)                      |
|                                                                             | Very intense, n (%)    | 2 (0.6%)                      |
|                                                                             | <b>Mean score (SD)</b> | <b>1.3 (0.7)</b>              |
| <b>Please rate the comfort of this test (1-5)</b>                           | Very good, n (%)       | 209 (63.5%)                   |
|                                                                             | Good, n (%)            | 103 (31.3%)                   |
|                                                                             | Moderate, n (%)        | 16 (4.9%)                     |
|                                                                             | Poor, n (%)            | 0 (0%)                        |
|                                                                             | Very poor, n (%)       | 1 (0.3%)                      |
|                                                                             | <b>Mean score (SD)</b> | <b>1.4 (0.6%)</b>             |
| <b>Please rate your degree of helplessness during this test (1-5)</b>       | No helplessness, n (%) | 130 (69.9%)                   |
|                                                                             | Little, n (%)          | 76 (23.1%)                    |
|                                                                             | Moderate, n (%)        | 16 (4.9%)                     |
|                                                                             | Intense, n (%)         | 5 (1.5%)                      |
|                                                                             | Very intense, n (%)    | 2 (0.6%)                      |
|                                                                             | <b>Mean score (SD)</b> | <b>1.4 (0.7)</b>              |
| <b>Please rate your pain during and immediately after this test (0-5)</b>   | <b>Mean score (SD)</b> | <b>0.5 (0.8)</b>              |
| <b>Please rate your overall satisfaction with this test (1-5)</b>           | Very good, n (%)       | 232 (70.5%)                   |
|                                                                             | Good, n (%)            | 90 (27.4%)                    |
|                                                                             | Moderate, n (%)        | 7 (2.1%)                      |
|                                                                             | Poor, n (%)            | 0 (0%)                        |
|                                                                             | Very poor, n (%)       | 0 (0%)                        |
|                                                                             | <b>Mean score (SD)</b> | <b>1.3 (0.5)</b>              |

7. **Table S6: Subgroup analysis for the primary endpoint of CIN.** \*Adjusted for baseline creatinine & ACS

|                                                 | Treatment group     |              | Covariate adjusted* |         |                        |
|-------------------------------------------------|---------------------|--------------|---------------------|---------|------------------------|
|                                                 | ICA + CTCA<br>N=315 | ICA<br>N=319 | OR (98.33% CI)      | P-value | Interaction<br>p-value |
| <b>Non-Caucasian (N=261)</b>                    | 2 (1.79)            | 36 (24.16)   | 0.06 (0.01 to 0.34) | <0.001  | 0.662                  |
| <b>White (N=373)</b>                            | 8 (3.94)            | 53 (31.18)   | 0.08 (0.03 to 0.22) | <0.001  |                        |
| <b>No ACS (N=339)</b>                           | 4 (2.38)            | 41 (23.98)   | 0.07 (0.02 to 0.26) | <0.001  | 0.818                  |
| <b>ACS (N=295)</b>                              | 6 (4.08)            | 48 (32.43)   | 0.09 (0.03 to 0.25) | <0.001  |                        |
| <b>No previous angiogram since CABG (N=343)</b> | 7 (3.70)            | 47 (30.52)   | 0.08 (0.03 to 0.23) | <0.001  | 0.826                  |
| <b>Previous angiogram since CABG (N=291)</b>    | 3 (2.38)            | 42 (25.45)   | 0.07 (0.02 to 0.30) | <0.001  |                        |
| <b>Junior operator (N=454)</b>                  | 10 (4.07)           | 59 (28.37)   | 0.10 (0.04 to 0.24) | <0.001  | -                      |
| <b>Senior operator (N=161)</b>                  | 0                   | 30 (27.03)   | -                   | <0.001  |                        |



8. **Table S7. Percutaneous Coronary Intervention Data.** Data are reported as number (%) aside from the mean scores which are mean (SD).

|                                        |                        | <b>CTCA + ICA<br/>N=139</b> | <b>ICA<br/>N=141</b> | <b>P Value</b> |
|----------------------------------------|------------------------|-----------------------------|----------------------|----------------|
| <b>Number undergoing PCI</b>           |                        | 139 (40.4%)                 | 141 (41.0%)          | 0.88           |
| <b>Multi-vessel Intervention</b>       |                        | 7 (5.0%)                    | 10 (7.1%)            | 0.47           |
| <b>Total number of vessels treated</b> |                        | 148                         | 151                  | 0.47           |
| <b>Vessel Treated</b>                  | LMS                    | 13                          | 12                   | 0.81           |
|                                        | Cx                     | 37                          | 31                   | 0.37           |
|                                        | Im                     | 0                           | 3                    | 0.25           |
|                                        | LAD                    | 20                          | 17                   | 0.60           |
|                                        | RCA                    | 34                          | 33                   | 0.84           |
|                                        | Graft                  |                             |                      | -              |
|                                        | LIMA                   | 1                           | 2                    | 0.57           |
|                                        | Radial                 | 1                           | 1                    | 0.99           |
|                                        | VG                     | 42                          | 52                   | 0.24           |
| <b>Adjunctive technique</b>            | Rotational Atherectomy | 7 (5.0%)                    | 8 (5.7%)             | 0.71           |
|                                        | Shockwave              | 2 (1.4%)                    | 1 (0.7%)             |                |
|                                        | Laser                  | 0 (0%)                      | 1 (0.7%)             |                |
|                                        | None                   | 130 (93.5%)                 | 131 (92.9%)          |                |
| <b>Number of stents</b>                | 0                      | 36 (25.9%)                  | 27 (19.2%)           | 0.24           |
|                                        | 1                      | 68 (48.9%)                  | 68 (48.2%)           |                |
|                                        | 2                      | 27 (19.4%)                  | 36 (25.5%)           |                |
|                                        | 3                      | 6 (4.3%)                    | 10 (7.1%)            |                |
|                                        | 4                      | 2 (1.4%)                    | 0 (0%)               |                |
| <b>Total contrast (mls)</b>            |                        | 126.8 (84.0)                | 258.7 (76.9)         | <0.001         |
| <b>Fluoroscopy Time (mins)</b>         |                        | 22.8 (13.0)                 | 25.2 (13.8)          | 0.11           |
| <b>Radiation effective dose (mSv)</b>  |                        | 6.9 (6.3)                   | 6.2 (4.4)            | 0.29           |
|                                        |                        |                             |                      |                |
